# Supplementary material
Source: PubMed Central journal article supplement (PMC9763259)
Supplement: 41541_2022_580_MOESM1_ESM.pdf [file 41541_2022_580_MOESM1_ESM.pdf]

## Supplementary Figures

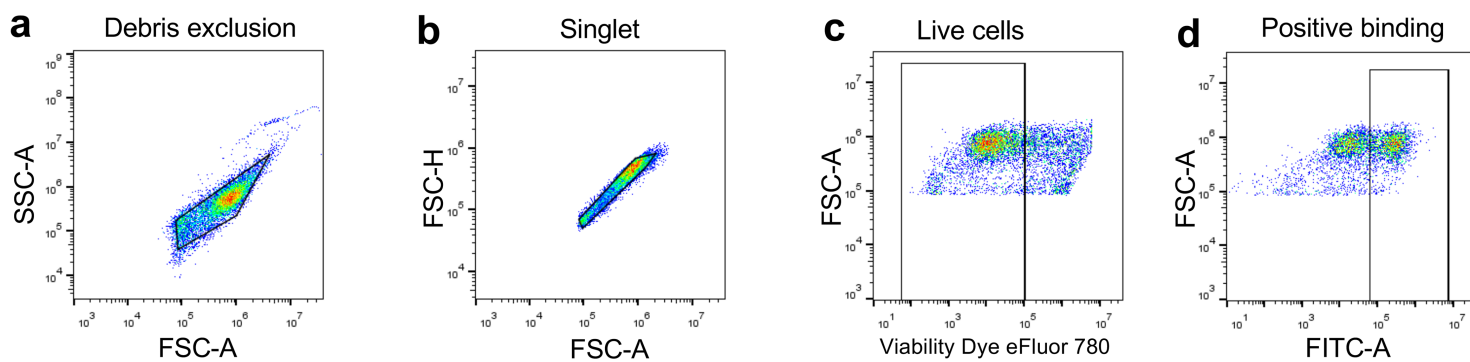

**Supplementary Figure 1.** Gating strategy to determine the binding of each S protein to bat ACE2-expressing 293T cells. **(a)** Forward and side scatter density plots for excluding debris. **(b)** Forward scatter height (FSC-H) versus forward scatter area (FSC-A) plot for doublet exclusion. **(c)** Fixable Viability Dye eFluor 780 was used to exclude dead cells. **(d)** FITC-A was used to identify cells that specifically bound to the target proteins.
